# Supplementary material for: Metabolism and Bioavailability of Olive Bioactive Constituents Based on In Vitro, In Vivo and Human Studies
Source: MDPI journal article supplement (doi:10.3390/nu14183773), 2022-09-13
Supplement: s1 [file s1]

Archive with 1 entries (1 files):
- nutrients-1881897-supplementary.pdf
